# Supplementary material for: Composition and diversity of gut microbiota across developmental stages of Spodoptera frugiperda and its effect on the reproduction
Source: Front Microbiol. 2023 Sep 18;14:1237684. doi: 10.3389/fmicb.2023.1237684 (PMC10543693; doi:10.3389/fmicb.2023.1237684)
Supplement: Supplementary file 5 [file Table_2.XLSX]

## Sheet: Sheet1
Sample Name	Raw Reads	Clean Reads	Raw Tags	Clean Tags	Total length
4th larva-1	129357	129237	128118	127961	56480154
4th larva-2	127113	126994	125931	125797	56406342
4th larva-3	129422	129275	128110	127968	57737902
6th larva-1	130763	130584	129324	129180	58520877
6th larva-2	127685	127545	126411	126286	57568129
64t larva-3	124095	123953	122924	122806	54414320
female pupa-1	134020	133866	132740	132587	57557994
female pupa -2	128991	128863	127750	127592	56100965
female pupa -3	135905	135748	134572	134423	57869477
male pupa -1	121249	121130	120191	120096	54128695
male pupa -2	131682	131547	130461	130330	59215058
male pupa -3	137777	137613	136428	136298	61909973
female adult-1	131933	131809	130694	130522	59598402
female adult-2	135829	135710	134620	134486	60906525
female adult-3	137053	136929	135768	135597	61633005
male adult-1	136947	136801	135556	135380	60763589
male adult-2	124220	124106	123070	122895	56422203
male adult-3	137974	137795	136493	136292	61324951
egg-1	129009	128833	126024	124544	54091364
egg-2	133443	133322	131999	131744	59282011
egg-3	136843	136726	135698	135508	61054278
